# Supplementary material
Source: Frontiers journal article supplement (https://www.frontiersin.org/articles/509309)

# Training programs of participating assistance dog schools

Figure 1: Training of seizure dogs at Hulphond Nederland (HN)

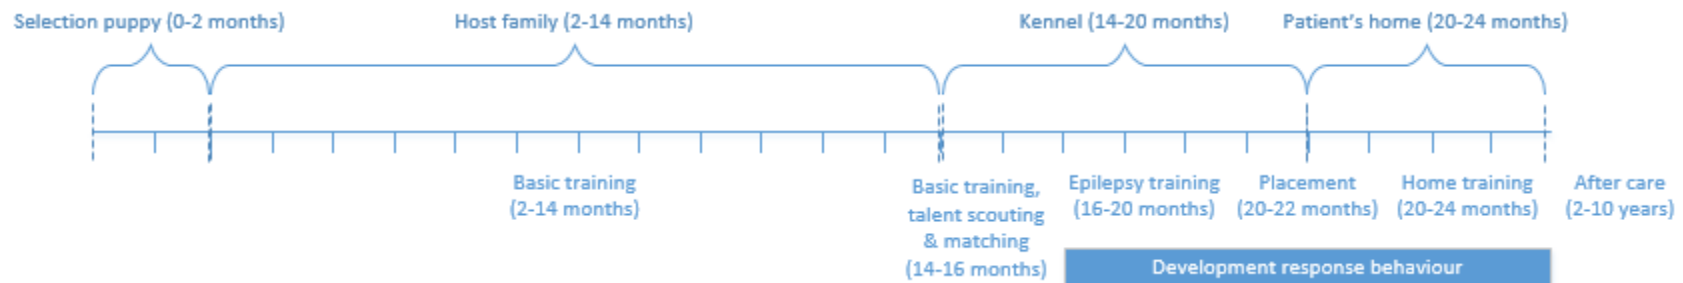

Figure 2: Training of seizure dogs at Bultersmekke Assistancedogs (BMA)

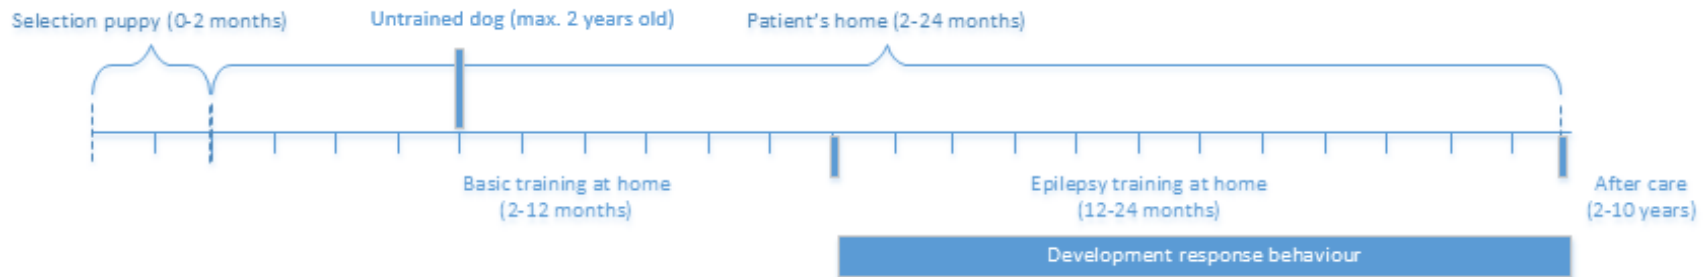

Supplement: Data_Sheet_1.PDF [file Data_Sheet_1.PDF]
